# Supplementary material for: Improving the Utilization of Isomaltose and Panose by Lager Yeast Saccharomyces pastorianus
Source: MDPI journal article supplement (doi:10.3390/fermentation7030107), 2021-07-07
Supplement: s1 [file s1]

## Supplementary materials

### Integration sites designed for two model lager yeast

We designed five integration sites for *Saccharomyces pastorianus* lager yeast. All the integrations sites are identical in both model lager yeast LG160 and LG230. These integration sites are distributed in two chromosomes represent as Sp\_X and Sp\_XI. The integration sites denominated as Sp\_X-1, Sp\_X-2, and Sp\_X-3 are more than 97% similar to the homologous regions of the *Saccharomyces eubayanus* chromosome X; whereas, Sp\_XI-1 and Sp\_XI-2 are completely identical to homologous regions of *Saccharomyces cerevisiae* chromosome XI.

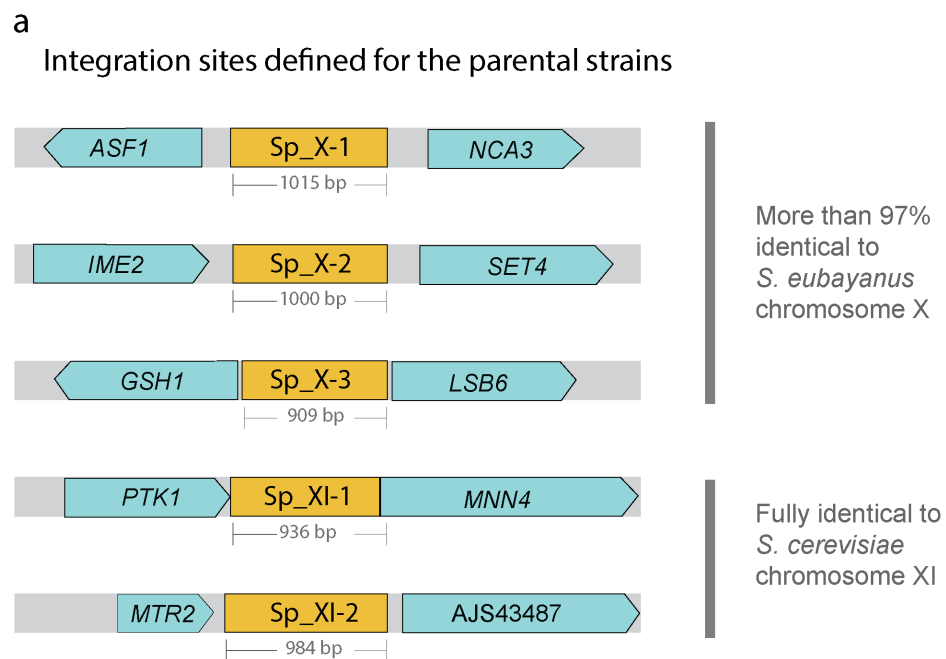

**Figure S1.** Representation of the location of the integration sites designed for the model lager yeast LG160 and LG230. The integrations sites are distributed in two chromosomes, which are homologous to chromosomes X and XI of *S. eubayanus* and *S. cerevisiae*, respectively.

## Nucleotide sequences of the integration sites

**Table S1.** Nucleotide sequences of lager yeast integration sites

| Integration site | Nucleotide sequence                                                                                                                                                                                                                                                                                                                                                                                                                                                                                                                                                                                                                                                                                                                                                                                                                                                                                                                                                                                                                                                                                  |
|------------------|------------------------------------------------------------------------------------------------------------------------------------------------------------------------------------------------------------------------------------------------------------------------------------------------------------------------------------------------------------------------------------------------------------------------------------------------------------------------------------------------------------------------------------------------------------------------------------------------------------------------------------------------------------------------------------------------------------------------------------------------------------------------------------------------------------------------------------------------------------------------------------------------------------------------------------------------------------------------------------------------------------------------------------------------------------------------------------------------------|
| Sp_X-1           | GGAACAGATTTACGTGTTTCGGGCGACAAAAAAAAAAAAACGCCAGAAAAAGTAAAACGCGTAAAAGTCGATAATGGTCCATTTTA<br>AAACCCAAACCAACCTTGTGAAACCAGAATCTTACCGAGGCGCTGCCGCCCCGATTATATGCAAGAAAACCAACCACAGAGCAGG<br>GGGGTGTTC AAGGTTAGGCACGGCACAGAGCCGAAAAAAAAAAGAAAGGACAAGGACATGGGCAAGATGAGACCGGACAAGGAA<br>AAGAACTCGATGGAAC TAATCTCTGCTAAAGGCAACACAAGGGCCAGGCAACACTACGGCATCATGTATGCCAGCCAAAACCT<br>ATTTGCCTCCGTCTTGTGGTTTTCAAACACCGACCATAGCAGCCTGGGGAAAGACACACTTGAAGACTCGGATGAGGAAAGAAAC<br>AACGGGGCCACTCAATGTCTTCGTCAC TCATGCTCACCGCCAAGTATTCCAAAGCTTAATTGGTGGGCTCTTACCAAACACGCACAC<br>ACCCCGCCAGAAAAAGAAACGGCCGGCGCAAGTGGGCTGATGCGCAGTCGATGCGTGGGGTAACCGGCCTGCAAGTCAGGGCC<br>GGTTCGGTAGGCCTAGACCCGCACGTGACCGGTTCAAGGTACGGTTGCCTGCGGTGTTCTTTGCCAGAGGAAAAAAGAAACGGAA<br>GCAATTTACTCTATGCGGAAAAAGAGGATCCTGTGGCAGCAAATAGGTGCGCCATCTCCGAAAAAAAGTCTAGACAATACCATG<br>GCAATTAACCCAAAGAGGATATTAGATCGAACATGAAATTTTGACATAAGTGGAATCGGTGGCGATGTTACGGTATAGTGTTC<br>AAGAGTAGGTGAGTGAGAAAAGGTGGAGTTTGTTGAAACTCCGGAATAAGTACTTGTACGGGTGGCGAAATGGAGATGCGT<br>TTTTTTGATATATAATCTGTAGACGCCATGACCAATGTACCCTTTCTTTCTGTCTTGTTTCTGTATATGTTTTGGTAGTGTTCGCCG |
| Sp_X-2           | GACAGAATACTAGTGTATTTATCGTTAACTGGGAAACACAGCAGCGATGGACCCGCTAATTTACCAAACCCCTATTACTGCATAC<br>GAAGAAAAGGCAGAAGAAAATTTTCGGTCGAAGCAAACCACATACAAAGAGGTTCCATGGACCAATAAAATACGACACGTATTT<br>TATTGGGAGTCTAGGCTATATGCAAAGAAAGATGAGTCTACATGAAAACATTCCTTTCCCTAAAAGGTGGTGTACGTATTTGAAGT<br>CAGTAGTAAACACCACCCACAGTTGTTTTTTTTCTAAACGACGAGCTTGGCTCTCCTTTGTTTTGATTTTGATGTCCTTCGTTTGTGAC<br>TTCACCCAGGAAAGCGAGATCGCCGAATGCCACGCGAGAGAAGGGATATAAGGTTTCAGGCACGAAAACAATAGGCAAGAAGC<br>AAAGGAGAACCGACATACGAGACTGGCGTGCCAGCGTTTACGGAAGTTATACCTAACTAGCCGGACATTAACAAAAGGCCAAGA<br>CCGACGGCGCATATACACGCAATCACATTCGTTTTTCATATACCAAGAACTCACCTGAGTTTTTTACTTCTCTCTACCATTTTTTGCA<br>CGTTACATTATGCAGCTTGAAGAGTTTTTAACGAGATGAAATAGTCCGCCTACATCAGGCACGAAGGCACCGTCGTATATGCAGTG<br>GAACTCTATCGCACTGGACAATCAAATCACACAGGTATAGGTAACAAAAAAAAGCTGCGTCTCAATCGAGAGTCGATCTCTTCG<br>TTTGGCTTTGCTTGGCTGGCGCCGTCGTTTTCTTCGCTTATACCCGCCCTTTGACGCTCGACCTCGTTCATCGAGGTACCTTTAATCT<br>TGCACATTTTCTGGCTTTTTTCTCGTCCGCACCTCGAGTACATGTAATCATGCACACAGAAGGTGCTGCAGCCAGGCGTTCCTTTCT<br>ACTAGTCGTTTGCTTTTGATGCCAAACTTCCTGGTGATCAAGAACCACCTCCTT                   |

---

Sp\_X-3

ACTCTAAAGCAGTTCTTTTCTGGCAAAACGATGAAAGAGAAAAGCCTAACTCTGAAATTTAGCCTTTTTTTATATCAACTTTTTTCAG  
TTTCTTGCAAGTAACTCAAGAACAGATGGAAAAATCCAGCAACTCAGGCGCAACAATATCACTCTTCTCGATCGTTCAAGATTCA  
AGAAGTGAACGAAAGACATCCAGGCTCCCCCCCCCTCCCATTCTGGCCTTTATAAATAAGAAAGACACCCATTGTCAAGGGAGGC  
ACATGGGTCTTTGGCTCAGTCTGCTTTTAGGAGTGAAAAATAAAAAAAAAAAGGACTCTATTCCAGTCGCCTCGCTGAAAAACCGGA  
GGCCTTCAGCCACAGTTGCGATCACGTGCACCCGATGCTGACTAATGACAGATGCCGCTGGGAAGAGAAGGTTTAGATGCATGCC  
ACAAGAACAACAGCTGCGTTCTCTAGAGACTGTTGGAGCGTGGAGGGTACACGTTGTCAACAAGCTGCTACATGCAGGACGACG  
GCTCTTGTATCGTCTTTGGGTTGGCCAGATGGCAGACACTGTACACACTTGCAAGGATGCGAATAGAAACGTATATGTACAGACTC  
GCAGCTGGATGGTTTGAGGTTACATGAACACATGGATATATTCATGAATATATTTATTTATAACTACGTGCATATGTAGATTTCTCC  
CTCTCGAGCAGCATTTCTATTAAGCTGGAGCACCTTACTTGTATGTAACAAGACGCTTTTTTTCTGTTCCCTAGTTAGTTATCTTCGCA  
TCAATTTTCCTTTTGACCGATAAAATCTCTTGGGTTTCTTAGATTAGACAATTGATGCGATCAAAGAAACCCAGTGAAATAATATGT  
GTATGATTGCGTGCAAAACGTATTGGAAACATTAATGAAGTTGGTGGAGC

---

Sp\_XI-1

CCTTCGCTCGCGTTTCGTGGCCACTCCCCGCACAGGGTAGTGCATCACCATCTAAACATTGTCAACAGCTTGGTCCATAGTTCTAG  
CGCGGCGTCTTCTCAGGTTCCGGCTTCGACCTAGCCAGAATGTGCAGCAGAGTAAATAATATTCACCTCCCTGTTCCCTAAAACGTA  
CAATATACAACACCAACCTCATATCAACTACCAGAAACAGTATCATAACGTAATAGTTATTTTTTATTTTTTTAATTTTTTTTTTTTTT  
CCACTGACCAGTCTTCGCGGCGGTGTGAGTTCCGTCTGTACGCAGCATTTAGCAGAGATTTGCCAATGCCAAGAACTCCACTAA  
ACTAACATCGCATTGCAATGGGCTTGGTATTCCGTGGAAGAAAATGAAAACCGGCGCAAAGAATCCTCCGAGAAAGTTTGATGC  
GGTGCACGGATTTACGACGGATTTTATTTTTTTTGCACCCCCCAATTTCTCGGCGATGATAAACATACTGCATCTAAAACCGTAT  
ACAGGAGGCTACGGTACAGAAGCCAAGATTAACAAAAAAAAAAAAAAAAAGAAAAAAAAAGAAAAAGAAAAATGTCAAGTGTT  
ATTCCTTGTCCTCTGACCTACGTAGTTACTTGCCTGGCTTCAAATTTAGATATCAGCGCTCGAGACGTCCTGATCTCTATACCTTA  
TTGCTTGCTTTAGGTCGAGGCGATAAAAAAATAATTACATCTTCGGTTCTTTCCCCCTTTTTATATATCTGCAACAATATTAACAA  
TTAAATTAAAGAAGCACGTTTCCGTTTTTTATCATATACCATTCCCCTAACCGCCGAACCTACCGCATCACAACGTCATTCCTT  
CACACAAATAAACTAATTAGTTATGCTTCAGCGAATATCAACTAACTGCACAGGCGGTTCTTATCTGGCCTGC

---

Sp\_XI-2

---

CCTGTGCCCTTTCTATTTTTATGGTTGAAAAGGTTACAGAGGATCCTCTGGAGCGGTGACAACAGTTGACGCAATCATGGTCCCTG  
GCGGTCCCTAAGGATATCTCGGAGGAACCGAGGCACGGAAACGGCTGAACGGGTCCGCCAGATAAGGATAATTCAGCCGTCACG  
CATGAACAGAAGGATGAGCATTGCTCACATTCCTAGACTTAACCTACATGAATGAAAAGAAGAACACCAATGTTGGAGTAGGG  
CTTCGCACCAAACCTTTAATCAAGAAATCCGAGGAGAAATGATTCTAAGTCTAGCCAAGAAAACCTGCAAAGCGCGCCAAAAGTAA  
GAAAACGACAAAGTTTTTCTAGCAATTTTTTTTTTTCATCAACAGTAGAACTAGATTTATATAACTGTTACCGCTAAAACCTACAT  
CTAAACTTTTTAATACCTGAAAGCACTAGTCGTGTGTACCCCCCTCAACTGATCAACTGATCAGCGAGCTTTGCTTGTGGAAGTTC  
ATGGCAGACGCTCCTTGGCTTTTGCCTAGTCTTGTTCTATGGCACATTTTTCTGTTGAGTTATACCCCGCGTGCTAAAAAAGGGGTG  
AACCATCAGAAAGCTTATTACTGAGTTTTGCGGAGCATCGCTCGGAGCGGCGGAATTGAATCGAACCGCCGTGCTATTACCGAAC  
AAAAAAATTCGAAAGCATAAACTCAGTAGTGAAAAACTTGAGAATTTTCAGATGAGTGGCGACTTTCCAGTCCTTGCGGTTTTGTC  
ACCTTAGTCAGCTAGTAAGGAGGCCGTGTGGGTAGAGTGGCTACAATGCTCAAAGGGCACTTCTAGAACCCACGGTAAATTTTTT  
TTGGCATGATAAATCGGTAGAATCGGTGAAGTAATTACCCAAAAAAGGATCGGGATTGTGTTTCTCGTAATCCGTATTATTGCCG  
ATGGCATCGACTACTTCTTTTTTCAGAAACCCCAACAAGGGTC

---

## List of primers used in this study

**Table S2.** List of primers used in this study. USER™ overhangs are underlined and KOZAK sequences are shown in italics/bold letters

| Primer_ID | Sequence                                          | Description                                   |
|-----------|---------------------------------------------------|-----------------------------------------------|
| CP0001    | <u>ATTAAGTCCU</u> CAGCGAGCTCG                     | Used to amplify biobrick bCP001               |
| CP0002    | <u>ATTAATGCCU</u> CAGCACTAGTCCTG                  | Used to amplify biobrick bCP001               |
| CP0003    | <u>AGACCTCAGU</u> GCGGCCGCAAATTTA<br>AATAAAATGAAG | Used to amplify biobrick bCP002               |
| CP0004    | <u>ATTA AACCCU</u> CAGCGCGG                       | Used to amplify biobrick bCP002               |
| CP0017    | <u>AGGGTTTAAU</u> CCTTCCGCTCGCGTTC                | Used to amplify biobrick bCP009               |
| CP0018    | <u>AGGACTTAAU</u> CATCAAACCTTCTCG<br>GAGGATTCTTTG | Used to amplify biobrick bCP009               |
| CP0019    | <u>AGGCATTAAU</u> CGGTGCACGGATTTC<br>AG           | Used to amplify biobrick bCP010               |
| CP0020    | <u>ACTGAGGTCU</u> G CAGGCCAGATAAG<br>AACCG        | Used to amplify biobrick bCP010               |
| CP0021    | <u>AGGGTTTAAU</u> G GTTACAGAGGATCC<br>TCTGGAG     | Used to amplify biobrick bCP011               |
| CP0022    | <u>AGGACTTAAU</u> CTCGCTGATCAGTTG<br>ATCAGTTG     | Used to amplify biobrick bCP011               |
| CP0023    | <u>AGGCATTAAU</u> CTTTGCTTGTGGAAGT<br>TCATGGC     | Used to amplify biobrick bCP012               |
| CP0024    | <u>ACTGAGGTCU</u> G ACCCTTGTTGGGGTT<br>TCTG       | Used to amplify biobrick bCP012               |
| CP0071    | CAGCGTTTCTGGGTGAGC                                | Used for sequencing of the assembled plasmids |
| CP0072    | GGGGATTTTAAATGCGGCCG                              | Used for sequencing of the assembled plasmids |
| CP0073    | GATCGCACGCATTCCGT                                 | Used for sequencing of the assembled plasmids |
| CP0074    | ACGGAATGCGTGCGATC                                 | Used for sequencing of the assembled plasmids |
| CP0075    | CAGTTATGAGGGTACTGTCGTTCC                          | Used for sequencing of the assembled plasmids |
| CP0076    | CATCATCGAATCCAGCTGACC                             | Used for sequencing of the assembled plasmids |
| CP0077    | ACCTCCAGACCTCAGUGC                                | Used for sequencing of the assembled plasmids |
| CP0078    | CAGAATCAGGGGATAACGCAG                             | Used for sequencing of the assembled plasmids |
| CP0079    | TCCCGTCAAGTCAGCGT                                 | Used for sequencing of the assembled plasmids |

|              |                                                                |                                                       |
|--------------|----------------------------------------------------------------|-------------------------------------------------------|
| CP0094       | <u>ACCTGCACU</u> TTTTAGGCTGGTATCTT<br>GATTCTAAATCG             | Used to amplify biobrick bCP043                       |
| CP0095       | <u>ATGACAGAU</u> TGTTTTATATTTGTTG<br>TAAAAAGTAGATAATTACTTCCTTG | Used to amplify biobrick bCP043                       |
| CP0096       | <u>ATCTGTCAU</u> AAAAACAATGAAAAATA<br>TCATTTCAATGGTAAGCAAGAAG  | Used to amplify biobrick bCP044                       |
| CP0097       | <u>CACGCGAU</u> TTAACATTTATCAGCTG<br>CATTTAATTCTCGC            | Used to amplify biobrick bCP044                       |
| CP0096_<br>b | <u>CGTGCGAU</u> TTAACATTTATCAGCTGC<br>ATTTAATTCTCGC            | Used to amplify biobrick bCP049                       |
| CP0097_<br>b | <u>AGTGCAGGU</u> AAAAACAATGAAAAAT<br>ATCATTTCAATGGTAAGCAAGAAG  | Used to amplify biobrick bCP049                       |
| CP0098       | <u>CGTGCGAU</u> CACCCATGAACCACACG<br>G                         | Used to amplify biobrick bCP045                       |
| CP0099       | <u>ATGACAGAU</u> TTATTGATATAGTGTTT<br>AAGCGAATGACAGAAGA        | Used to amplify biobrick bCP045                       |
| CP0100       | <u>ATCTGTCAU</u> AAAAACAATGACTATTTT<br>TTCTGCACATCCAGAG        | Used to amplify biobrick bCP046                       |
| CP0101       | <u>CACGCGAU</u> TCATTCGCTGATATATAT<br>TCTTCCTTCCC              | Used to amplify biobrick bCP046                       |
| CP0108       | CCCTATTTACACTTAGGGAAACCC                                       | Used to verify the insertion in the Int. Site<br>XI-1 |
| CP0109       | CAAGTCCGTTACGCTGCGG                                            | Used to verify the insertion in the Int. Site<br>XI-1 |
| CP0110       | GGAAGATTCCGCTCTACCAG                                           | Used to verify the insertion in the Int. Site<br>XI-2 |
| CP0111       | CGTATGAGGATTTTCGATGGAGC                                        | Used to verify the insertion in the Int. Site<br>XI-2 |
| CP0113       | CGTGCGAUATTCAGTTTTCTGACTGA<br>GTTAAAAACTAATG                   | Used to amplify biobrick bCP051                       |
| CP0114       | CGTGCGAUATTCAGTTTTCTGACTGA<br>GTTAAAAACTAATG                   | Used to amplify biobrick bCP051                       |

## Biobricks used in this study.

**Table S3.** List of biobricks used in this study.

| Biobrick_ID | Expected length | Description                                                                                                                                       |
|-------------|-----------------|---------------------------------------------------------------------------------------------------------------------------------------------------|
| bCP001      | 2160            | Part of [1] plasmids amplified using primers CP0001 and CP0002                                                                                    |
| bCP002      | 2800            | Part of [1] plasmids amplified using primers CP0003 and CP0004                                                                                    |
| bCP009      | 450             | Amplification of <i>S. pastorianus</i> XI_I-UP integration site from gDNA_LG232 using primers CP0017 and CP0018 for USER™ cloning                 |
| bCP010      | 526             | Amplification of <i>S. pastorianus</i> XI_I-DW integration site from gDNA_LG232 using primers CP0019 and CP0020 for USER™ cloning                 |
| bCP011      | 482             | Amplification of <i>S. pastorianus</i> XI_II-UP integration site from gDNA_LG232 using primers CP0021 and CP0022 for USER™ cloning                |
| bCP012      | 511             | Amplification of <i>S. pastorianus</i> XI_II-DW integration site from gDNA_LG232 using primers CP0023 and CP0024 for USER™ cloning                |
| bCP043      | 2000            | Amplification of the double promoter P <sub>PGI1</sub> -P <sub>PGK1</sub> from plasmid pCfB3479 using primers CP0094 and CP0095 for USER™ cloning |
| bCP044      | 1800            | Amplification of Seq19 using primers CP0096 and CP0097 for USER™ cloning                                                                          |
| bCP045      | 430             | Amplification of promoter P <sub>CCW12</sub> from plasmid Ant_E113 using primers CP0098 and CP0099 for USER™ cloning                              |
| bCP046      | 1800            | Amplification of Seq15 using primers CP0100 and CP0101 for USER™ cloning                                                                          |
| bCP049      | 1800            | Amplification of Seq19 using primers CP0096_b and CP0097_b for USER™ cloning                                                                      |
| bCP051      | 1016            | Amplification of promoter P <sub>PGI1</sub> using primers CP0113 and CP0114 for USER™ cloning                                                     |

## List of plasmids used in this work.

**Table S4.** List of plasmids used in this study.

| Plasmid_ID | Description                                                                                                                 | Reference                                                     |
|------------|-----------------------------------------------------------------------------------------------------------------------------|---------------------------------------------------------------|
| Ant_E113   | Used for the amplification of various biobricks                                                                             | Plasmid kindly provided by Helen Olsson from DTU-Biosustain   |
| pCfB3479   | Used for the amplification of various biobricks                                                                             | Plasmid kindly provided by Irina Borodina from DTU-Biosustain |
| pX-2       | Used for the amplification of various biobricks                                                                             | [1]                                                           |
| pCP0005    | Integrative plasmid, X3-DR-KIURA3                                                                                           | This study                                                    |
| pCP0011    | Integrative plasmid, XI_1-DR-KIURA3                                                                                         | This study                                                    |
| pCP0015    | Integrative plasmid, XI_2-DR-KIURA3                                                                                         | This study                                                    |
| pCP0032    | Integrative plasmid, XI_1, DR-KIURA3, bCP045 (P <sub>CCW12</sub> ->), bCP046 (IMA1 ->)                                      | This study                                                    |
| pCP0044    | Integrative plasmid, XI_1, DR-KIURA3, bCP049 (AGT1 <-), bCP043 (<- P <sub>PGH</sub> -P <sub>PGK1</sub> ->),bCP046 (IMA1 ->) | This study                                                    |
| pCP0047    | Integrative plasmid, XI_2, DR-KIURA3, b_CP049 (AGT1<-), bCP043 (<- P <sub>PGH</sub> -P <sub>PGK1</sub> ->),bCP046 (IMA1 ->) | This study                                                    |
| pCP0066    | Integrative plasmid, X3, DR-KIURA3, bCP051 (P <sub>PGH</sub> ->), bCP044 (AGT1 ->)                                          | This study                                                    |



## Synthetic gene sequences

**Table S5.** Nucleotide sequences of the synthetic isomaltase and maltose transporter genes

| Gene        | Sequence                                                                                                                                                                                                                                                                                                                                                                                                                                                                                                                                                                                                                                                                                                                                                                                                                                                                                                                                                                                                                                                                                                                                                                                                                                                                                                                                                                                                                                                                                                                                                                                                                                                                                                                                                                                                                                                                                                               |
|-------------|------------------------------------------------------------------------------------------------------------------------------------------------------------------------------------------------------------------------------------------------------------------------------------------------------------------------------------------------------------------------------------------------------------------------------------------------------------------------------------------------------------------------------------------------------------------------------------------------------------------------------------------------------------------------------------------------------------------------------------------------------------------------------------------------------------------------------------------------------------------------------------------------------------------------------------------------------------------------------------------------------------------------------------------------------------------------------------------------------------------------------------------------------------------------------------------------------------------------------------------------------------------------------------------------------------------------------------------------------------------------------------------------------------------------------------------------------------------------------------------------------------------------------------------------------------------------------------------------------------------------------------------------------------------------------------------------------------------------------------------------------------------------------------------------------------------------------------------------------------------------------------------------------------------------|
| <i>IMA1</i> | ATGACTATTTCTTCTGCACATCCAGAGGCAGAACCAAAGTGGTGGAAAGAGGCCACGTTCTATCAAATTTACCCAGCAAGTTTCA<br>AAGACTCTAATGACGATGGCTGGGGTGATATGAAGGGTATTTCTCCAAGTTGGAGTATATCAAGGAGCTTGGTGCCGATGCCAT<br>TTGGATCTCACCATTCTACGACTCGCCACAAGATGATATGGGTTACGATATTGCCAACTACGAAAAGGTCTGGCCAACATATGGT<br>ACGAATGAAGACTGCTTTGCCTTGATCGAAAAGACACATAAGCTTGGTATGAAATTCATCACCGACTTGGTCATCAATCACTGTTC<br>CAGCGAACATGAATGGCTCAAAGAGAGCAGATCCTCGAAGACCAATCCGAAGCGTGACTGGTTCTTCTGGAGACCTCCTAAGGG<br>TTATGACGCCGAAGGCAAGCCAATTCCTCCAAATAATTGGAAGTCCTATTTTGGTGGTTCCGCATGGATCTTCGATGAAAAGACAC<br>AAGAATTCTACTTGCGTTTGTGTTTGTCTCCACTCAACCTGATTTGAATTGGGAGAATGAAGACTGTAGAAAGGCAATCTACGAAAGT<br>GCCGTTGGATACTGGTTAGACCATGGTGTAGACGGCTTTAGAATTGATGTCGGAAGTTTGTACTCCAAAGTTGTAGGTTTACCAGA<br>TGCCCCTGTTGTTGACAAAACTCGACTTGGCAATCCAGTGATCCATACACATTGAATGGACCACGTATTCACGAGTTCATCAAG<br>AAATGAATCAATTCATCAGAAACAGAGTGAAGGATGGCAGGGAGATTATGACAGTCGGTGAAATGCAACATGCTTCCGACGAAA<br>CTAAGAACTTTATACGAGTGCTTCAAGACACGAACTTAGTGAGTTATTTAACTTTTCCCACACTGATGTGGGGACTTCACCTTGT<br>TCCGTTACAACCTTGGTCCCATTTGAACTGAAGGATTGGAAGATTGCCCTTGCTGAGCTGTTTCAGGTTTCTTAATGGTACAGATTGTT<br>GGTCAACAATCTATCTGGAAAATCACGACCAACCTCGTTCAATTACGAGATTTGGTGACGATTCTCCTAAGAACCGTGTTATTTCT<br>GGTAAGTTACTCTCTGTGTTGCTAAGTGCCTTGACCGGTACTCTATATGTGTATCAGGGACAAGAGCTTGGCCAAATCAATTTCAA<br>GAACTGGCCTGTTGAAAAGTACGAGGATGTGCAATCAGAAACAACCTACAATGCAATTAAGAAGAGCATGGGGAAAACCTCAG<br>AGGAGATGAAAAAGTTTTTAGAAGCCATTGCCCTTATCTCCAGGGACCATGCTAGAACACCTATGCAATGGTCTCGTGAGGAGCC<br>AAATGCTGGTTTTTCTGGTCTAGTGCTAAACCATGGTTTTACTTGAACGACTCTTTCAGAGAAGGCATTAACGTGCAAGATGAAA<br>TCAAGGATCCCAACTCGGTTTTGAACTTCTGGAAGGAGGCCTTGAAGTTTAGAAAGGCGCATAAAGACATTACTGTGTACGGATA<br>CGATTTGAGTTTATTGATTTAGACAATAAGAAGTTGTTTAGCTTCACAAAGAAGTACAACAATAAAACATTGTTTGCGGCTTTGA<br>ACTTTAGCTCTGATGCGACAGATTTCAAGATTCCAAATGATGATTCATCGTTCAAGTTAGAGTTTGGAAGTATCCAAAGAAGGAG<br>GTAGATGCCTCTTCCAGAACATTGAAGCCATGGGAAGGAAGAATATATATCAGCGAATGA |

---

AGT1

ATGAAAAATATCATTTTCATTGGTAAGCAAGAAGAAGGCTGCCTCAAAAAATGAGGATAAAAAACATTTCTGAGTCTTCAAGAGAT  
ATTGTAAACCAACAGGAGGTTTTCAATACTGAAAATTTTGAAGAAGGGAGAAAGGATAGTGCCTTTGAGCTAGACCACTTAGAGT  
TCACCATCAATTCAGCCCAGTTAGGAGATTCTGACGAAGATAACGAGAATGTGATTAATGAGACGAACACTACTGATGATGCAA  
ATGAAGCTAACAGCGAGGAAAAAAGCATGACTTTAAAGCAGGCGTTGCTAATATATCCAAAAGCAGCCCTGTGGTCCATATTAG  
TGTCTACTACCCTGGTTATGGAAGGTTATGATACCGCACTACTGAACGCACTGTATGCCCTGCCAGTTTTTCAGAGAAAATTCGGT  
ACTTTGAACGGGGAGGGTTCTTACGAAATTACTTCCCAATGGCAGATTGGTTTAAACATGTGTGTCCAATGTGGTGAGATAAATTGG  
TTTGCAAATCACGCCTTATATGGTTGAATTTATGGGGAATCGTTATACGATGATTACAGCACTTGGTTTGTTAACTGCTTATGTCTTT  
ATCCTCTACTACTGTAAAAGTTTAGCTATGATTGCTGTGGGACAAGTTCTCTCAGCTATGCCATGGGGTTGTTTCCAGGGTTTGACT  
GTTACTTATGCTTCGGAAGTTTGCCCTTTAGCATTAAAGATATTATATGACCAGTTACTCCAACATTTGTTGGTTATTTGGTCAAATCT  
TCGCCTCTGGTATTATGAAAACTCACAAGAGAATTTAGGGAACTCTGACTTGGGCTATAAATTGCCATTTGCTTTACAATGGATT  
TGGCCTGCTCCTTTAATGATCGGTATCTTTTTCGCTCCTGAGTCGCCCTGGTGGTTGGTGAGAAAGGATAGGGTCGCTGAGGCAAG  
AAAATCTTTAAGCAGAATTTTGAGTGGTAAAGGCGCCGAGAAGGACATTCAAATTGATCTTACTTTAAAGCAGATTGAATTGACT  
ATTGAAAAAGAAAGACTTTTAGCATCTAAATCAGGATCATTCCCTTGATTGTTTCAAGGGAGTTAATGGAAGAAGAACGAGACTTG  
CATGTTTAACTTGGGTAGCTCAAAATACTAGCGGTGCCTGTTTACTTGGTTACTCGACATATTTTTTTGAAAGAGCAGGTATGGCCA  
CCGACAAGGCGTTTACTTTTTCTGTAATTCAGTACTGTCTTGGGTTAGCGGGTACACTTTGCTCCTGGGTAATATCTGGCCGTGTTG  
GTAGATGGACAATACTGACCTATGGTCTTGCAATTTCAAATGGTCTGCTTATTTATTATTGGTGGAATGGGTTTTGGTTCTGGAAGCG  
GCGCTAGTAATGGTGCCGGTGGTTTATTGCTGGCTTTATCATTCTTTTACAATGCTGGTATCGGTGCAGTTGTTTACTGTATCGTAAC  
TGAAATTCCATCAGCGGAGTTGAGAACTAAGACTATAGTGCTGGCCCGTATTTGCTACAATATCATGGCCGTATCAACGCTATAT  
TAACGCCCTATATGCTAAACGTGAGCGATTGGAAC TGGGGTGCCAAAAC TGGTCTATACTGGGGTGGTTTCACAGCAGTCACTTTA  
GCTTGGGTCATCATCGATCTGCCTGAGACAAGTGGTAGAACCTTCAGTGAAATTAATGAACTTTTCAACCAAGGGGTTCCCTGCCAG  
AAAATTTGCATCTACTGTGGTTGATCCATTCGGAAAGGGAAAAAC TCAACATGATTGCTAGATGATGAGAGTATCAGTCAGTCC  
TCAAGCATAAAACAGCGAGAATTAAATGCAGCTGATAAATGTTAA

---

## Estimation of the growth parameters

The growth parameters were estimated using the growth parametric model Baranyi and Roberts[2]. The integrated format of the two differential equations in which this model is based on can be written as:

$$\ln N = \ln N_0 + \mu_{max} \cdot A - \ln \left( 1 + \frac{\exp(\mu_{max}A) - 1}{\exp(\ln N_{max} - \ln N_0)} \right)$$

Where  $N$  is the cell number at time  $t$ ,  $N_0$  is the initial cell number, and  $\mu_{max}$  is the maximum growth rate.

$$A = t + \left( \frac{1}{\mu_{max}} \right) \cdot \ln \left( \frac{\exp(\mu_{max} \cdot t) + q_0}{1 + q_0} \right)$$

Where  $q$  represents the physiological state of the cell population, and  $q_0$  represents the initial state of the population. The lag phase was estimated as follows:

$$\text{lag time} = \frac{q_0}{\mu_{max}}$$

All the calculations were performed in R Studio version 1.4.1106 (RStudio Inc., Boston, MA, USA)[3] software using the package growthrates v0.8.2[4]. We utilized the first 120 h of the data points to feed the model. Only the data with a fitness to the model with  $r^2 > 0.9$  were considered to estimate the growth parameters.

Table S6. Growth parameters

| Carbon source | strain | $\mu$ (h <sup>-1</sup> ) | Carrying capacity | Lag Time (h) | r <sup>2</sup> |
|---------------|--------|--------------------------|-------------------|--------------|----------------|
| glucose       | LG160  | 0,057                    | 0,318             | 0,02         | 0,967          |
|               | LG160  | 0,049                    | 0,335             | 0,02         | 0,901          |
|               | LG160  | 0,061                    | 0,354             | 0,02         | 0,931          |
|               | LG230  | 0,040                    | 0,322             | 0,03         | 0,904          |
|               | sCP034 | 0,067                    | 0,287             | 0,01         | 0,935          |
|               | sCP034 | 0,034                    | 0,331             | 0,03         | 0,955          |
|               | sCP047 | 0,033                    | 0,314             | 0,03         | 0,953          |
|               | sCP101 | 0,087                    | 0,432             | 8,23         | 0,995          |
|               | sCP101 | 0,108                    | 0,456             | 14,41        | 0,992          |
|               | sCP101 | 0,128                    | 0,469             | 15,02        | 0,989          |
|               | sCP101 | 0,110                    | 0,490             | 11,29        | 0,984          |
|               | sCP107 | 0,082                    | 0,499             | 6,39         | 0,994          |
|               | sCP107 | 0,114                    | 0,474             | 11,70        | 0,991          |
|               | sCP107 | 0,109                    | 0,530             | 12,08        | 0,990          |
|               | sCP107 | 0,140                    | 0,503             | 13,75        | 0,993          |
| isomaltose    | LG160  | 0,194                    | 0,322             | 25,20        | 0,968          |
|               | LG160  | 0,109                    | 0,325             | 20,56        | 0,978          |
|               | LG160  | 0,067                    | 0,335             | 21,74        | 0,973          |

|        |        |       |       |       |       |
|--------|--------|-------|-------|-------|-------|
|        | LG160  | 0,050 | 0,359 | 16,34 | 0,968 |
|        | LG230  | 0,083 | 0,270 | 15,54 | 0,939 |
|        | LG230  | 0,030 | 0,304 | 3,73  | 0,951 |
|        | sCP034 | 0,035 | 0,299 | 25,79 | 0,956 |
|        | sCP041 | 0,077 | 0,558 | 13,63 | 0,996 |
|        | sCP041 | 0,066 | 0,534 | 16,73 | 0,996 |
|        | sCP041 | 0,092 | 0,580 | 17,38 | 0,997 |
|        | sCP041 | 0,062 | 0,571 | 16,25 | 0,997 |
|        | sCP047 | 0,026 | 0,567 | 0,04  | 0,980 |
|        | sCP047 | 0,017 | 0,636 | 0,06  | 0,969 |
|        | sCP047 | 0,016 | 0,802 | 0,06  | 0,993 |
|        | sCP101 | 0,049 | 0,419 | 14,35 | 0,991 |
|        | sCP101 | 0,062 | 0,415 | 29,29 | 0,978 |
|        | sCP101 | 0,047 | 0,460 | 6,74  | 0,994 |
|        | sCP107 | 0,214 | 0,312 | 16,78 | 0,946 |
|        | sCP107 | 0,162 | 0,325 | 20,15 | 0,973 |
|        | sCP107 | 0,084 | 0,318 | 6,00  | 0,954 |
| panose | sCP034 | 0,075 | 0,325 | 18,40 | 0,901 |
|        | sCP034 | 0,064 | 0,298 | 9,29  | 0,904 |
|        | sCP041 | 0,028 | 0,475 | 0,04  | 0,980 |
|        | sCP041 | 0,048 | 0,613 | 19,56 | 0,985 |
|        | sCP041 | 0,030 | 0,434 | 0,03  | 0,930 |
|        | sCP041 | 0,020 | 0,517 | 0,05  | 0,962 |
|        | sCP047 | 0,198 | 0,445 | 14,03 | 0,973 |
|        | sCP047 | 0,164 | 0,494 | 12,92 | 0,985 |
|        | sCP101 | 0,040 | 0,325 | 0,02  | 0,988 |
|        | sCP101 | 0,095 | 0,308 | 12,47 | 0,916 |
|        | sCP101 | 0,050 | 0,341 | 0,02  | 0,978 |
|        | sCP101 | 0,048 | 0,360 | 0,02  | 0,972 |

## Summary of the genome assemblies

**Table S7.** Summary of the statistics of the genome assemblies.

| Strain                          | LG160                                   | LG230                                                                 |
|---------------------------------|-----------------------------------------|-----------------------------------------------------------------------|
| Source of the reads             | Paired-end reads from<br>Illumina HiSeq | Paired-end reads from<br>Illumina HiSeq and<br>long reads from PacBio |
| # contigs                       | 466                                     | 413                                                                   |
| # contigs ( $\geq 0$ bp)        | 3030                                    | 413                                                                   |
| # contigs ( $\geq 1000$ bp)     | 374                                     | 413                                                                   |
| # contigs ( $\geq 5000$ bp)     | 264                                     | 413                                                                   |
| # contigs ( $\geq 10000$ bp)    | 238                                     | 394                                                                   |
| # contigs ( $\geq 25000$ bp)    | 194                                     | 212                                                                   |
| # contigs ( $\geq 50000$ bp)    | 136                                     | 141                                                                   |
| Largest contig                  | 473310                                  | 546161                                                                |
| Total length                    | 22263347                                | 26883767                                                              |
| Total length ( $\geq 0$ bp)     | 22668571                                | 26883767                                                              |
| Total length ( $\geq 1000$ bp)  | 22196358                                | 26883767                                                              |
| Total length ( $\geq 5000$ bp)  | 21963635                                | 26883767                                                              |
| Total length ( $\geq 10000$ bp) | 21775258                                | 26720695                                                              |
| Total length ( $\geq 25000$ bp) | 21071091                                | 23499906                                                              |
| Total length ( $\geq 50000$ bp) | 18882533                                | 21003994                                                              |
| N50                             | 138865                                  | 140211                                                                |
| N75                             | 71167                                   | 62600                                                                 |
| L50                             | 45                                      | 55                                                                    |
| L75                             | 99                                      | 126                                                                   |
| GC (%)                          | 39.1                                    | 38.5                                                                  |
| <b>Mismatches</b>               |                                         |                                                                       |
| # N's                           | 8207                                    | 0                                                                     |
| # N's per 100 kbp               | 36.86                                   | 0                                                                     |

## Phylogenetic tree of the several isomaltases

The nucleotide sequences of *IMA1* and *AGT1* used as a query in this study are part of the list of the upregulated genes reported by [5]. First, to verify endogenous gene copies of the genes *IMA1* and *AGT1*, we performed a BLAST analysis against the genomes of the model lager yeast LG160 and LG230, and two *S. eubayanus* strains CBS12357 (assembly: ASM332760v1[6]), and FM1318 (assembly: SEUB3.0[7]). From BLAST results, matching nucleotide sequences carrying truncated domains, incomplete TIM barrel's amino acid (aa) sequence, or holding premature stop codons, were excluded for further analysis. Then, using MAFFT[8] software, we employed a multiple sequence alignment MSA, in which, besides the isomaltases found in the model lager yeast, we included the isomaltases identified in the two available genomes of *S. eubayanus*, five isomaltases (*IMA1-5*), *MAL32* and *MAL12* from *S. cerevisiae* S288c[9], and *IMA1* from nine different *S. cerevisiae* strains. Then, an alignment curation using trimAI[10] software was performed, followed by the construction of phylogenetic trees using PhyML[11] and SMS[12] software, see *Figure S2*.

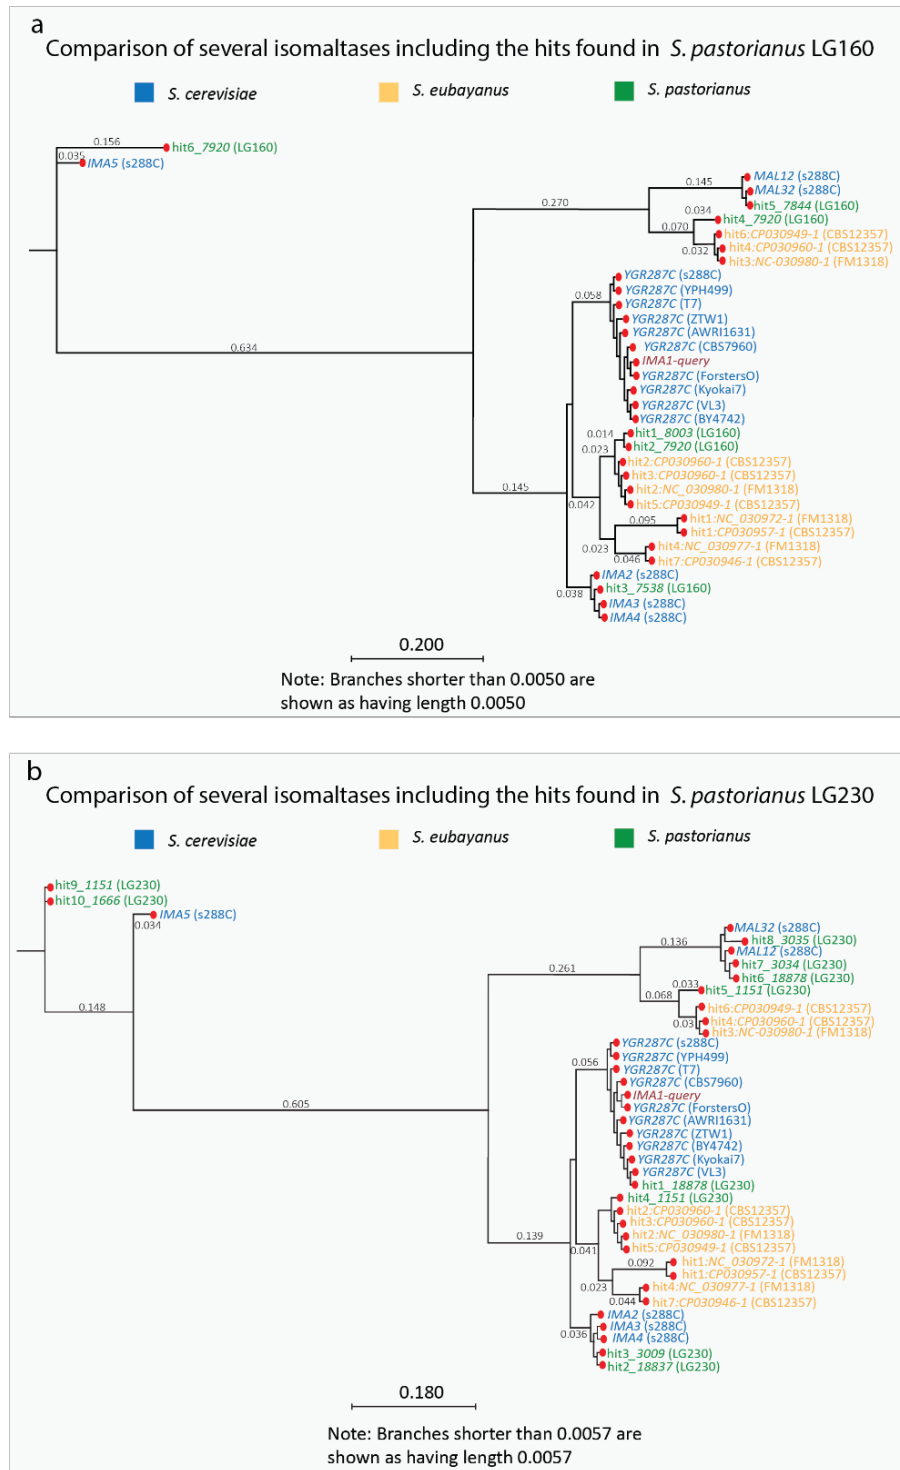

**Figure S2.** Neighbor joining phylogenetic trees of several isomaltases. The phylogenetic tree was built using PhyML[11] and SMS[12]. The bootstrap values are indicated on the branches. IMA-query indicates the query sequence used in this study. In green are highlighted the hits obtained for (a) *S. pastorianus* LG160 and (b) *S. pastorianus* LG230.

## References

1. Mikkelsen, M.D.; Buron, L.D.; Salomonsen, B.; Olsen, C.E.; Hansen, B.G.; Mortensen, U.H.; Halkier, B.A. Microbial production of indolylglucosinolate through engineering of a multi-gene pathway in a versatile yeast expression platform. *Metab. Eng.* **2012**, *14*, 104–111, doi:10.1016/j.ymben.2012.01.006.
2. Baranyi, J.; Roberts, T.A. A dynamic approach to predicting bacterial growth in food. *Int. J. Food Microbiol.* **1994**, *23*, 277–294, doi:https://doi.org/10.1016/0168-1605(94)90157-0.
3. RStudio Team RStudio: Integrated Development Environment for R. RStudio; PBC, Boston, MA, USA. Available online <https://www.rstudio.com/> (accessed on 5 July 2021).
4. Petzoldt, T. growthrates: Estimate Growth Rates from Experimental Data. R package version 0.8.2. Available online: <https://CRAN.R-project.org/package=growthrates> (accessed on 5 July 2021)
5. Solodovnikova, N.Y.; Garcia Sanchez, R.; Gojkovic, Z. WO2016101960. Yeast for preparing alcoholic beverages; publication date: 30 June 2016.
6. Brickwedde, A.; Brouwers, N.; Broek, M. van den; Gallego Murillo, J.S.; Fraiture, J.L.; Pronk, J.T.; Daran, J.M.G. Structural, physiological and regulatory analysis of maltose transporter genes in *Saccharomyces eubayanus* CBS 12357T. *Front. Microbiol.* **2018**, *9*, 1–18, doi:10.3389/fmicb.2018.01786.
7. Baker, E.C.; Wang, B.; Bellora, N.; Peris, D.; Hulfachor, A.B.; Koshalek, J.A.; Adams, M.; Libkind, D.; Hittinger, C.T. The genome sequence of *saccharomyces eubayanus* and the domestication of lager-brewing yeasts. *Mol. Biol. Evol.* **2015**, *32*, 2818–2831, doi:10.1093/molbev/msv168.
8. Katoh, K.; Standley, D.M. MAFFT multiple sequence alignment software version 7: improvements in performance and usability. *Mol. Biol. Evol.* **2013**, *30*, 772–780, doi:10.1093/molbev/mst010.
9. Teste, M.A.; Marie François, J.; Parrou, J.L. Characterization of a new multigene family encoding isomaltases in the yeast *Saccharomyces cerevisiae*, the IMA family. *J. Biol. Chem.* **2010**, *285*, 26815–26824, doi:10.1074/jbc.M110.145946.
10. Capella-Gutiérrez, S.; Silla-Martínez, J.M.; Gabaldón, T. trimAl: a tool for automated alignment trimming in large-scale phylogenetic analyses. *Bioinformatics* **2009**, *25*, 1972–1973, doi:10.1093/bioinformatics/btp348.
11. Guindon, S.; Gascuel, O. A Simple, Fast, and Accurate Algorithm to Estimate Large Phylogenies by Maximum Likelihood. *Syst. Biol.* **2003**, *52*, 696–704, doi:10.1080/10635150390235520.
12. Lefort, V.; Longueville, J.-E.; Gascuel, O. SMS: Smart Model Selection in PhyML. *Mol. Biol. Evol.* **2017**, *34*, 2422–2424, doi:10.1093/molbev/msx149.
